# Supplementary material for: Palladium-catalyzed S-benzylation of unprotected mercaptobenzoic acid with benzyl alcohols in water
Source: Royal Society of Chemistry journal article supplement (doi:10.1039/c2ob25091h), 2012-01-01

## Supporting Information

### Palladium-catalyzed *S*-benzylation of unprotected mercaptobenzoic acid with benzyl alcohols in water

*Faculty of Pharmaceutical Sciences, Toho University, Funabashi, Chiba 274-8510, Japan*  
*hidemasa.hikawa@phar.toho-u.ac.jp and yokoyama@phar.toho-u.ac.jp*

|                                                                                       |               |
|---------------------------------------------------------------------------------------|---------------|
| <b>1. Table of contents</b>                                                           | <b>S1</b>     |
| <b>2. General procedure</b>                                                           | <b>S2</b>     |
| <b>3. Characterization of 3a-s</b>                                                    | <b>S2-S6</b>  |
| <b>4. Copies of <sup>1</sup>H and <sup>13</sup>C NMR spectra of the new compounds</b> | <b>S7-S16</b> |

**General procedure:** A mixture of mercaptobenzoic acid **1** (1 mmol), palladium(II) acetate (12 mg, 0.05 mmol), sodium diphenylphosphinobenzene-3-sulfonate (TPPMS, 36 mg, 0.1 mmol) and benzyl alcohol **2** (5 mmol) in H<sub>2</sub>O (4 mL) was heated for 24-48 h in sealed tube. After cooling, the reaction mixture was poured into water and extracted with EtOAc. The organic layer was washed with brine, dried over MgSO<sub>4</sub> and concentrated in vacuo. The residue was washed with hexanes, then purified by flash column chromatography (silica gel, hexanes/EtOAc) to give desired product **3**.

**4-Benzylthiobenzoic acid 3a (Table 1, entry 1)**<sup>1</sup>

Following the general procedure, **3a** was obtained as a white solid. mp 188-190 °C; IR (KBr) (cm<sup>-1</sup>) 3401, 2925, 1676, 1589, 1419, 1289; <sup>1</sup>H NMR (400 MHz, DMSO-d<sub>6</sub>): δ 4.35 (s, 2H), 7.23 (t, *J*=7.2 Hz, 1H), 7.32 (dd, *J*=7.2, 7.2 Hz, 2H), 7.41 (d, *J*=7.2 Hz, 2H), 7.42 (d, *J*=8.4 Hz, 2H), 7.82 (d, *J*=8.4 Hz, 2H), 12.9 (brs, 1H); <sup>13</sup>C NMR (400 MHz, DMSO-d<sub>6</sub>): δ 35.3, 126.4, 127.2, 127.4, 128.5, 128.8, 129.7, 136.8, 143.0, 166.9; MS (EI): *m/z* (%) 244 (M<sup>+</sup>, 35.0), 91 (100).

**3-Benzylthiobenzoic acid 3b (Table 2, entry 1)**<sup>2</sup>

Following the general procedure, **3b** was obtained as a white solid. mp 129-131 °C; IR (KBr) (cm<sup>-1</sup>) 2847, 1689, 1579, 1433, 1288; <sup>1</sup>H NMR (400 MHz, DMSO-d<sub>6</sub>): δ 4.30 (s, 2H), 7.23 (t, *J*=7.2 Hz, 1H), 7.30 (t, *J*=7.2 Hz, 2H), 7.35-7.39 (m, 2H), 7.42 (t, *J*=8.0 Hz, 1H), 7.55-7.60 (m, 1H), 7.73 (dt, *J*=8.0, 1.2 Hz, 1H), 7.84 (t, *J*=1.6 Hz, 1H), 13.1 (brs, 1H); <sup>13</sup>C NMR (400 MHz, DMSO-d<sub>6</sub>): δ 36.4, 126.7, 127.1, 128.4, 128.6, 128.8, 129.2, 131.5, 132.3, 136.9, 137.1, 166.8; MS(EI): *m/z* (%) 244 (M<sup>+</sup>, 67.1), 91 (100).

**2-Benzylthiobenzoic acid 3c (Table 2, entry 2)**<sup>2</sup>

Following the general procedure, **3c** was obtained as a white solid. mp 187-189 °C; IR (KBr) (cm<sup>-1</sup>) 3413, 2920, 1674, 1459, 1411, 1262; <sup>1</sup>H NMR (400 MHz, DMSO-d<sub>6</sub>): δ 4.21 (s, 2H), 7.18-7.23 (m, 1H), 7.27 (t, *J*=6.0 Hz, 1H), 7.34 (t, *J*=7.2 Hz, 2H), 7.40-7.60 (m, 2H), 7.48-7.52 (m, 2H), 7.89 (d, *J*=7.6 Hz, 1H), 13.0 (brs, 1H); <sup>13</sup>C NMR (400 MHz, DMSO-d<sub>6</sub>): δ 35.7, 124.0, 125.7, 127.1, 127.6, 128.5, 129.2, 130.9, 132.3, 136.6, 141.2, 167.4; MS(EI): *m/z* (%) 244 (M<sup>+</sup>, 25.1), 91 (100).

**2-Benzylthio-5-fluorobenzoic acid 3d (Table 2, entry 3)**<sup>3</sup>

Following the general procedure, **3d** was obtained as a white solid. mp 153-155 °C; IR (KBr) (cm<sup>-1</sup>) 3034, 2912, 1690, 1465, 1424, 1246; <sup>1</sup>H NMR (400 MHz, DMSO-d<sub>6</sub>): δ 4.21 (s, 2H), 7.27 (t, *J*=7.2 Hz, 1H), 7.34 (t, *J*=7.2 Hz, 2H), 7.38-7.44 (m, 3H), 7.51 (dd, *J*=9.0, 5.2 Hz, 1H), 7.63 (dd, *J*=9.0, 2.8 Hz, 1H), 13.4 (brs, 1H); <sup>13</sup>C NMR (400 MHz, DMSO-d<sub>6</sub>): δ 36.1, 117.0, 117.3, 119.3, 119.5, 127.2, 128.3, 128.4, 128.5, 129.1, 129.9, 130.0, 136.2, 136.5, 157.8, 160.2, 166.4; MS(EI): *m/z* (%) 262 (M<sup>+</sup>, 18.7), 91 (100).

**2-Benzylthio-5-chlorobenzoic acid 3e (Table 2, entry 4)**<sup>4</sup>

Following the general procedure, **3e** was obtained as a white solid. mp 162-164 °C; IR (KBr) (cm<sup>-1</sup>) 2924, 1681, 1462, 1317, 1250; <sup>1</sup>H NMR (400 MHz, DMSO-d<sub>6</sub>): δ 4.23 (s, 2H), 7.27 (t, *J*=7.2 Hz, 1H), 7.34 (t, *J*=6.0 Hz, 2H), 7.43 (d, *J*=7.2 Hz, 2H), 7.51 (d, *J*=8.6 Hz, 1H), 7.58 (dd, *J*=8.6, 2.4 Hz, 1H), 7.84 (d, *J*=2.4 Hz, 1H), 13.4 (brs, 1H); <sup>13</sup>C NMR (400 MHz, DMSO-d<sub>6</sub>): δ 35.7, 127.3, 127.7, 128.5, 129.1, 130.1, 131.9, 136.3, 140.2, 166.2; MS (EI): *m/z* (%) 280 (M<sup>+</sup>+2, 13.3), 278 (M<sup>+</sup>, 35.8), 91 (100).

#### 4-(4-Methylbenzylthio)benzoic acid **3f** (Table 3, entry 1) <sup>5</sup>

Following the general procedure, **3f** was obtained as a white solid. mp 210-212 °C; IR (KBr) (cm<sup>-1</sup>) 2916, 1681, 1588, 1418, 1288; <sup>1</sup>H NMR (400 MHz, DMSO-d<sub>6</sub>): δ 2.26 (s, 3H), 4.30 (s, 2H), 7.11 (d, *J*=8.0 Hz, 2H), 7.29 (d, *J*=8.0 Hz, 2H), 7.41 (d, *J*=8.4 Hz, 2H), 7.82 (d, *J*=8.4 Hz, 2H), 12.9 (brs, 1H); <sup>13</sup>C NMR (400 MHz, DMSO-d<sub>6</sub>): δ 20.6, 35.1, 126.4, 127.3, 128.7, 129.0, 129.7, 133.6, 136.4, 143.1, 166.9; MS (EI): *m/z* (%) 258 (M<sup>+</sup>, 13.9), 105 (100).

#### 4-(4-Ethylbenzylthio)benzoic acid **3g** (Table 3, entry 2) <sup>6</sup>

Following the general procedure, **3g** was obtained as a white solid. mp 203-205 °C; IR (KBr) (cm<sup>-1</sup>) 2963, 1680, 1587, 1417, 1288; <sup>1</sup>H NMR (400 MHz, DMSO-d<sub>6</sub>): δ 1.15 (t, *J*=8.0 Hz, 3H), 2.56 (q, *J*=8.0 Hz, 2H), 4.31 (s, 2H), 7.15 (d, *J*=8.0 Hz, 2H), 7.32 (d, *J*=8.0 Hz, 2H), 7.41 (d, *J*=8.4 Hz, 2H), 7.83 (d, *J*=8.4 Hz, 2H), 12.9 (brs, 1H); <sup>13</sup>C NMR (400 MHz, DMSO-d<sub>6</sub>): δ 15.5, 27.8, 35.0, 126.3, 127.3, 127.9, 128.8, 129.7, 133.9, 142.8, 143.2, 167.0; MS(EI): *m/z* (%) 272 (M<sup>+</sup>, 12.4), 119 (100).

#### 4-(4-Methoxybenzylthio)benzoic acid **3h** (Table 3, entry 3) <sup>7</sup>

Following the general procedure, **3h** was obtained as a white solid. mp 200-202 °C; IR (KBr) (cm<sup>-1</sup>) 2955, 1683, 1589, 1505, 1419, 1294; <sup>1</sup>H NMR (400 MHz, DMSO-d<sub>6</sub>): δ 3.72 (s, 3H), 4.29 (s, 2H), 6.87 (d, *J*=8.8 Hz, 2H), 7.33 (d, *J*=8.8 Hz, 2H), 7.40 (d, *J*=8.8 Hz, 2H), 7.83 (d, *J*=8.4 Hz, 2H), 12.9 (brs, 1H); <sup>13</sup>C NMR (400 MHz, DMSO-d<sub>6</sub>): δ 34.8, 55.0, 113.9, 126.4, 127.3, 128.4, 129.7, 130.0, 143.3, 158.4, 166.9; MS (EI): *m/z* (%) 274 (M<sup>+</sup>, 9.4), 121 (100).

#### 4-(2-Methylbenzylthio)benzoic acid **3i** (Table 3, entry 4) <sup>8</sup>

Following the general procedure, **3i** was obtained as a white solid. mp 173-175 °C; IR (KBr) (cm<sup>-1</sup>) 2866, 1678, 1587, 1415, 1286; <sup>1</sup>H NMR (400 MHz, DMSO-d<sub>6</sub>): δ 2.38 (s, 3H), 4.33 (s, 2H), 7.10-7.25 (m, 3H), 7.32 (d, *J*=7.2 Hz, 1H), 7.44 (d, *J*=8.0 Hz, 2H), 7.86 (d, *J*=8.0 Hz, 2H), 12.9 (brs, 1H); <sup>13</sup>C NMR (400 MHz, DMSO-d<sub>6</sub>): δ 18.7, 34.1, 126.0, 126.6, 127.5, 127.6, 129.7, 130.4, 134.1, 136.7, 143.3, 167.0; MS(EI): *m/z* (%) 258 (M<sup>+</sup>, 16.7), 105 (100).

#### 4-(4-Fluorobenzylthio)benzoic acid **3j** (Table 3, entry 5) <sup>9</sup>

Following the general procedure, **3j** was obtained as an off-white solid. mp 197-199 °C; IR (KBr) (cm<sup>-1</sup>)

2821, 1675, 1589, 1503, 1415, 1286; <sup>1</sup>H NMR (400 MHz, DMSO-d<sub>6</sub>): δ 4.35 (s, 2H), 7.14 (d, *J*=8.8 Hz, 2H), 7.42 (d, *J*=8.4 Hz, 2H), 7.45 (dd, *J*=8.8, 5.6 Hz, 2H), 7.83 (d, *J*=8.4 Hz, 2H), 12.9 (brs, 1H); <sup>13</sup>C NMR (400 MHz, DMSO-d<sub>6</sub>): δ 34.5, 115.1, 115.4, 126.5, 127.5, 129.7, 130.8, 133.0, 133.1, 142.7, 160.1, 162.5, 166.9; MS (EI): *m/z* (%) 262 (M<sup>+</sup>, 48.7), 109 (100).

#### 4-(4-Bromobenzylthio)benzoic acid **3k** (Table 3, entry 6) <sup>1</sup>

Following the general procedure, **3k** was obtained as a white solid. mp 222-224 °C; IR (KBr) (cm<sup>-1</sup>) 2879, 1684, 1589, 1419, 1291; <sup>1</sup>H NMR (400 MHz, DMSO-d<sub>6</sub>): δ 4.34 (s, 2H), 7.38 (d, *J*=8.4 Hz, 2H), 7.41 (d, *J*=8.0 Hz, 2H), 7.50 (d, *J*=8.4 Hz, 2H), 7.83 (d, *J*=8.4 Hz, 2H), 12.9 (brs, 1H); <sup>13</sup>C NMR (400 MHz, DMSO-d<sub>6</sub>): δ 34.5, 120.3, 126.6, 127.6, 129.7, 131.0, 131.3, 136.5, 142.5, 166.9; MS(EI): *m/z* (%) 324 (M<sup>+</sup>+2, 17.8), 322 (M<sup>+</sup>, 17.2), 169 (100).

#### 4-(3-Bromobenzylthio)benzoic acid **3l** (Table 3, entry 7) <sup>10</sup>

Following the general procedure, **3l** was obtained as a white solid. mp 162-164 °C; IR (KBr) (cm<sup>-1</sup>) 2830, 1678, 1588, 1419, 1291; <sup>1</sup>H NMR (400 MHz, DMSO-d<sub>6</sub>): δ 4.36 (s, 2H), 7.28 (t, *J*=7.6 Hz, 1H), 7.40-7.46 (m, 4H), 7.63 (s, 1H), 7.83 (d, *J*=8.4 Hz, 2H), 12.9 (brs, 1H); <sup>13</sup>C NMR (400 MHz, DMSO-d<sub>6</sub>): δ 34.5, 121.6, 126.7, 127.6, 127.9, 129.7, 130.1, 130.6, 131.5, 139.9, 142.3, 166.9; MS (EI): *m/z* (%) 324 (M<sup>+</sup>+2, 36.0), 322 (M<sup>+</sup>, 35.1), 169 (100).

#### 4-(4-Chlorobenzylthio)benzoic acid **3m** (Table 3, entry 8) <sup>11</sup>

Following the general procedure, **3m** was obtained as a white solid. mp 210-212 °C; IR (KBr) (cm<sup>-1</sup>) 2842, 1685, 1589, 1419, 1295; <sup>1</sup>H NMR (400 MHz, DMSO-d<sub>6</sub>): δ 4.36 (s, 2H), 7.34-7.46 (m, 6H), 7.83 (d, *J*=8.0 Hz, 2H), 12.9 (brs, 1H); <sup>13</sup>C NMR (400 MHz, DMSO-d<sub>6</sub>): δ 34.5, 126.6, 127.6, 128.4, 129.7, 130.7, 131.8, 136.1, 142.5, 166.9; MS(EI): *m/z* (%) 280 (M<sup>+</sup>+2, 6.6), 278 (M<sup>+</sup>, 17.2), 125 (100).

#### 4-(1-Phenylethylthio)benzoic acid **3n** (Table 4, entry 1)

Following the general procedure, **3n** was obtained as a white solid. mp 172-174 °C; IR (KBr) (cm<sup>-1</sup>) 3430, 2974, 2920, 1683, 1591, 1426, 1301; <sup>1</sup>H NMR (400 MHz, DMSO-d<sub>6</sub>): δ 1.59 (d, *J*=6.8 Hz, 3H), 4.81 (q, *J*=6.8 Hz, 1H), 7.23 (t, *J*=7.2 Hz, 1H), 7.32 (t, *J*=7.2 Hz, 2H), 7.40 (d, *J*=8.4 Hz, 2H), 7.45 (d, *J*=7.2 Hz, 2H), 7.80 (d, *J*=8.4 Hz, 2H), 12.9 (brs, 1H); <sup>13</sup>C NMR (400 MHz, DMSO-d<sub>6</sub>): δ 22.3, 44.6, 127.2, 127.3, 127.9, 128.2, 128.5, 129.6, 142.0, 142.5, 166.9; MS (EI): *m/z* (%) 258 (M<sup>+</sup>, 57.5), 105 (100); Anal. Calcd for C<sub>15</sub>H<sub>14</sub>O<sub>2</sub>S: C, 69.74; H, 5.46. Found: C, 69.61; H, 5.44.

#### 4-(1-Phenylpropylthio)benzoic acid **3o** (Table 4, entry 2)

Following the general procedure, **3o** was obtained as a white solid. mp 150-152 °C; IR (KBr) (cm<sup>-1</sup>) 2973, 1684, 1592, 1424, 1296; <sup>1</sup>H NMR (400 MHz, DMSO-d<sub>6</sub>): δ 0.80-0.90 (m, 3H), 1.80-2.00 (m, 2H),

4.50-4.60 (m, 1H), 7.20-7.26 (m, 1H), 7.31 (t,  $J=6.8$  Hz, 2H), 7.36-7.44 (m, 4H), 7.78 (dd,  $J=8.8, 2.4$  Hz, 2H), 12.9 (brs, 1H);  $^{13}\text{C}$  NMR (400 MHz, DMSO- $d_6$ ):  $\delta$  11.9, 29.2, 51.4, 127.2, 127.7, 127.8, 128.1, 128.4, 129.6, 141.2, 142.1, 166.9; MS (EI):  $m/z$  (%) 272 ( $M^+$ , 24.1), 91 (100); Anal. Calcd for  $\text{C}_{16}\text{H}_{16}\text{O}_2\text{S}$ : C, 70.56; H, 5.92. Found: C, 70.32; H, 5.92.

#### 4-(1,2,3,4-Tetrahydronaphthalen-1-ylthio)benzoic acid **3p** (Table 4, entry 3)

Following the general procedure, **3p** was obtained as an off-white solid. mp 169-171 °C; IR (KBr) ( $\text{cm}^{-1}$ ) 2936, 1684, 1590, 1418, 1286;  $^1\text{H}$  NMR (400 MHz, DMSO- $d_6$ ):  $\delta$  1.70-1.80 (m, 1H), 1.90-2.10 (m, 3H), 2.65-2.85 (m, 2H), 4.98 (s, 1H), 7.10-7.20 (m, 3H), 7.38 (d,  $J=7.2$  Hz, 1H), 7.53 (d,  $J=8.0$  Hz, 2H), 7.90 (dd,  $J=8.4, 1.2$  Hz, 2H), 12.9 (brs, 1H);  $^{13}\text{C}$  NMR (400 MHz, DMSO- $d_6$ ):  $\delta$  18.2, 27.9, 28.3, 44.6, 125.7, 127.2, 128.0, 129.1, 129.9, 130.4, 134.3, 137.5, 142.6, 166.9; MS (EI):  $m/z$  (%) 284 ( $M^+$ , 6.0), 131 (100); Anal. Calcd for  $\text{C}_{17}\text{H}_{16}\text{O}_2\text{S}$ : C, 71.80; H, 5.67. Found: C, 71.75; H, 5.70.

#### 4-(2,3-Dihydro-1H-inden-1-ylthio)benzoic acid **3q** (Table 4, entry 4)

Following the general procedure, **3q** was obtained as an off-white solid. mp 183-185 °C; IR (KBr) ( $\text{cm}^{-1}$ ) 2949, 1681, 1588, 1415, 1286;  $^1\text{H}$  NMR (400 MHz, DMSO- $d_6$ ):  $\delta$  2.00-2.15 (m, 1H), 2.55-2.70 (m, 1H), 2.85-2.95 (m, 1H), 2.95-3.05 (m, 1H), 5.10-5.15 (m, 1H), 7.16-7.34 (m, 4H), 7.49 (d,  $J=8.4$  Hz, 2H), 7.89 (d,  $J=8.4$  Hz, 2H), 12.9 (brs, 1H);  $^{13}\text{C}$  NMR (400 MHz, DMSO- $d_6$ ):  $\delta$  30.3, 33.2, 49.1, 124.7, 124.8, 126.6, 127.4, 127.7, 128.0, 129.8, 141.7, 143.1, 143.6, 166.9; MS (EI):  $m/z$  (%) 270 ( $M^+$ , 8.7), 117 (100); Anal. Calcd for  $\text{C}_{16}\text{H}_{14}\text{O}_2\text{S}$ : C, 71.08; H, 5.22. Found: C, 70.94; H, 5.27.

#### 4-(Benzhydrylthio)benzoic acid **3r** (Table 4, entry 5)

Following the general procedure, **3r** was obtained as an off-white solid. mp 179-181 °C; IR (KBr) ( $\text{cm}^{-1}$ ) 3021, 1685, 1591, 1488, 1417, 1282;  $^1\text{H}$  NMR (400 MHz, DMSO- $d_6$ ):  $\delta$  6.13 (s, 1H), 7.23 (t,  $J=7.2$  Hz, 2H), 7.30-7.40 (m, 6H), 7.52 (d,  $J=7.6$  Hz, 4H), 7.75 (d,  $J=8.4$  Hz, 2H), 12.9 (brs, 1H);  $^{13}\text{C}$  NMR (400 MHz, DMSO- $d_6$ ):  $\delta$  53.3, 127.4, 127.8, 128.0, 128.7, 129.6, 140.5, 142.2, 166.8; MS(EI):  $m/z$  (%) 320 ( $M^+$ , 2.1), 167 (100); Anal. Calcd for  $\text{C}_{20}\text{H}_{16}\text{O}_2\text{S}$ : C, 74.97; H, 5.03. Found: C, 74.87; H, 5.14.

#### 4-(Thiophen-2-ylmethylthio)benzoic acid **3s** (Table 4, entry 6) <sup>12</sup>

Following the general procedure, **3s** was obtained as an off-white solid. mp 136-138 °C; IR (KBr) ( $\text{cm}^{-1}$ ) 2838, 1678, 1589, 1417, 1290;  $^1\text{H}$  NMR (400 MHz, DMSO- $d_6$ ):  $\delta$  4.60 (s, 2H), 6.93 (dd,  $J=5.2, 3.6$  Hz, 1H), 7.07 (d,  $J=3.6$  Hz, 1H), 7.40 (dd,  $J=5.2, 1.2$  Hz, 1H), 7.45 (d,  $J=8.4$  Hz, 2H), 7.84 (d,  $J=8.0$  Hz, 2H), 12.9 (brs, 1H);  $^{13}\text{C}$  NMR (400 MHz, DMSO- $d_6$ ):  $\delta$  30.1, 125.6, 126.8, 126.9, 127.7, 129.7, 140.1, 142.2, 166.9; MS (EI):  $m/z$  (%) 250 ( $M^+$ , 30.7), 97 (100).

- 1) Ham, J.; Yang, I.; Kang, H. *J. Org. Chem.* 2004, **69**, 3236-3239.
- 2) Ko, J.; Ham, J.; Yang, I.; Chin, J.; Nam, S.-J.; Kang, H. *Tetrahedron Lett.* 2006, **47**, 7101-7106.
- 3) CAS Registry Number: 1275222-61-1
- 4) Lombardino, J. G.; Wiseman, E. H. *J. Med. Chem.* 1970, **13**, 206-210.
- 5) CAS Registry Number: 1041590-07-1
- 6) CAS Registry Number: 1272244-15-1
- 7) Glossop, P. A.; Millan, D. S.; Price, D. A. WO 2010136940.
- 8) CAS Registry Number: 1036434-06-6
- 9) CAS Registry Number: 1021000-75-8
- 10) CAS Registry Number: 1020937-60-3
- 11) CAS Registry Number: 1036468-71-9
- 12) CAS Registry Number: 1019372-72-5

HH3-60-4

H:HH3-60-4.als

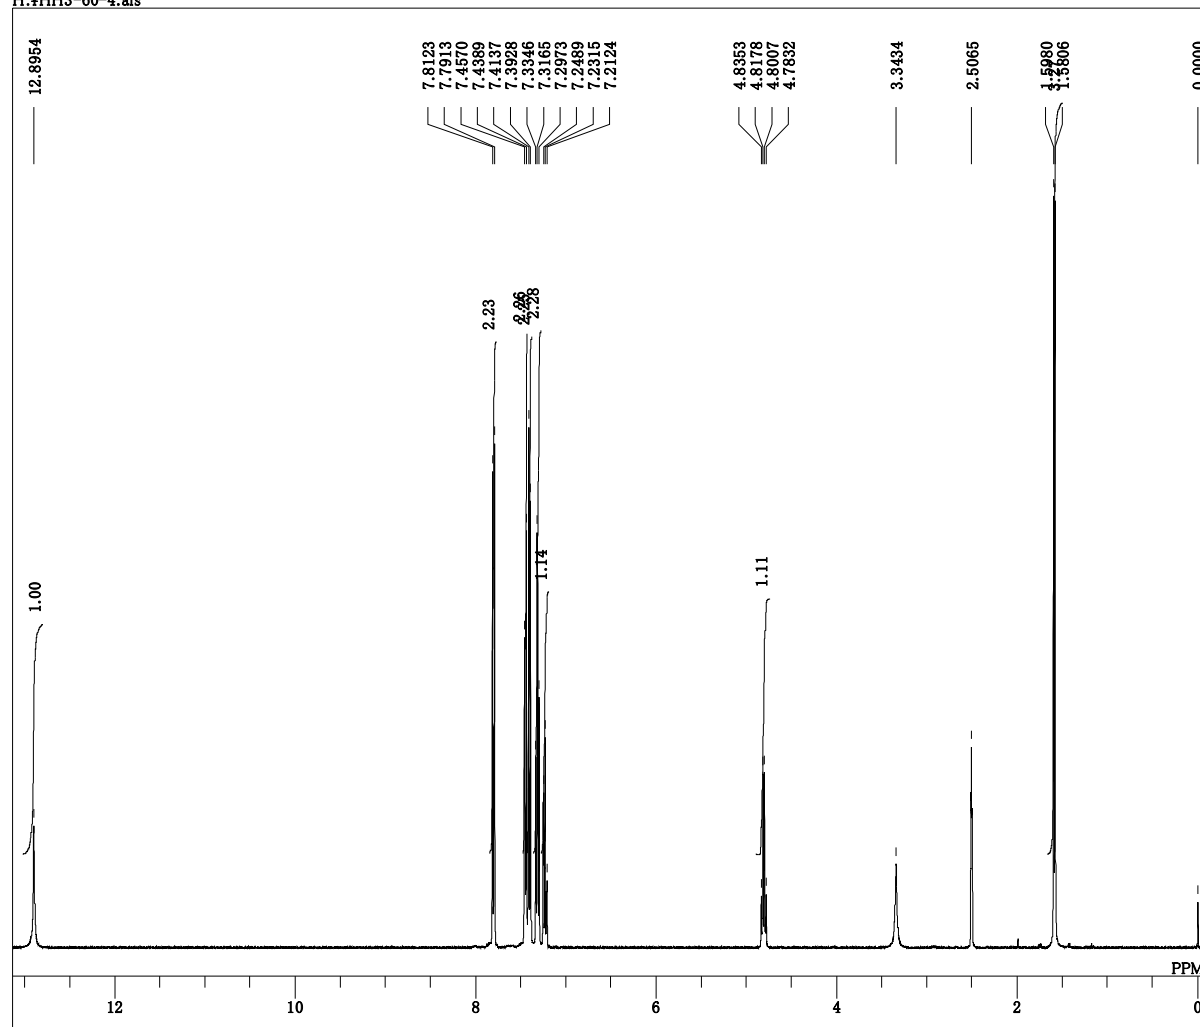

DFILE HH3-60-4.als  
COMNT HH3-60-4  
DATIM Thu Oct 06 14:13:43 2011  
OBNUC 1H  
EXMOD NON  
OBFRQ 399.65 MHz  
OBSET 124.00 KHz  
OBFIN 11300.00 Hz  
POINT 65536  
FREQU 6006.01 Hz  
SCANS 8  
ACQTM 10.9117 sec  
PD 1.0000 sec  
PW1 5.50 usec  
IRNUC 1H  
CTEMP 22.8 c  
SLVNT DMSO  
EXREF 0.00 ppm  
BF 0.12 Hz  
RGAIN 16

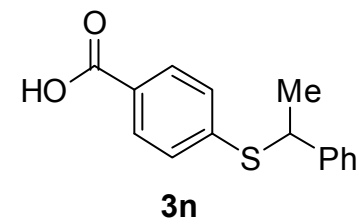

HH3-60-4

H:\HH3-60-4C.als

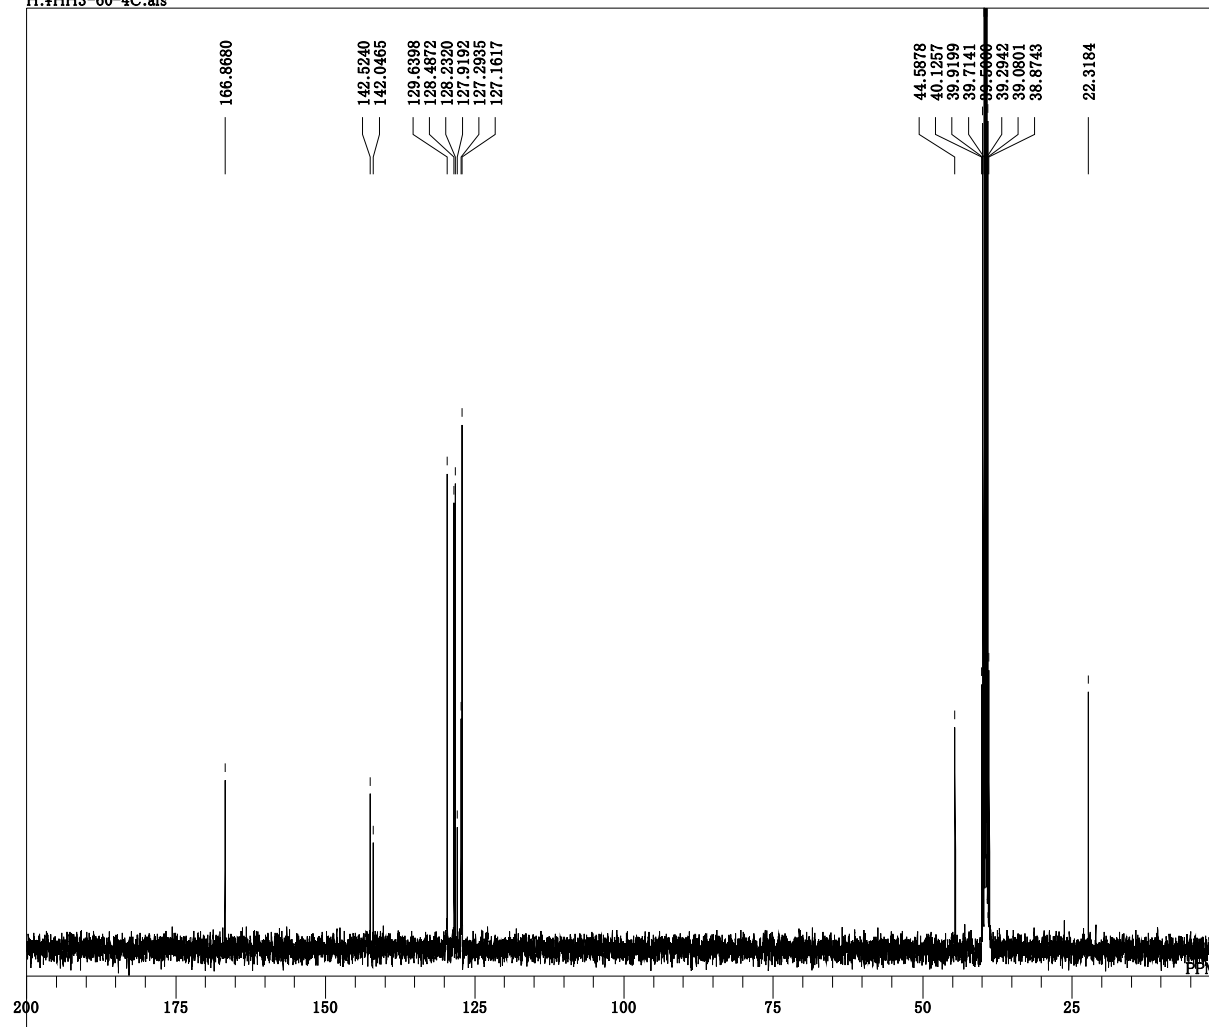

DFILE HH3-60-4C.als  
COMNT HH3-60-4  
DATIM Thu Oct 06 14:24:44 2011  
OBNUC 13C  
EXMOD BCM  
OBFRQ 100.40 MHz  
OBSET 125.00 KHz  
OBFIN 10500.00 Hz  
POINT 32768  
FREQU 27118.64 Hz  
SCANS 200  
ACQTM 1.2083 sec  
PD 1.7920 sec  
PW1 4.70 usec  
IRNUC 1H  
CTEMP 22.9 c  
SLVNT DMSO  
EXREF 39.50 ppm  
BF 1.20 Hz  
RGAIN 24

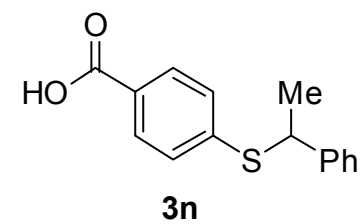



HH3-63-4

H:HH3-63-4.als

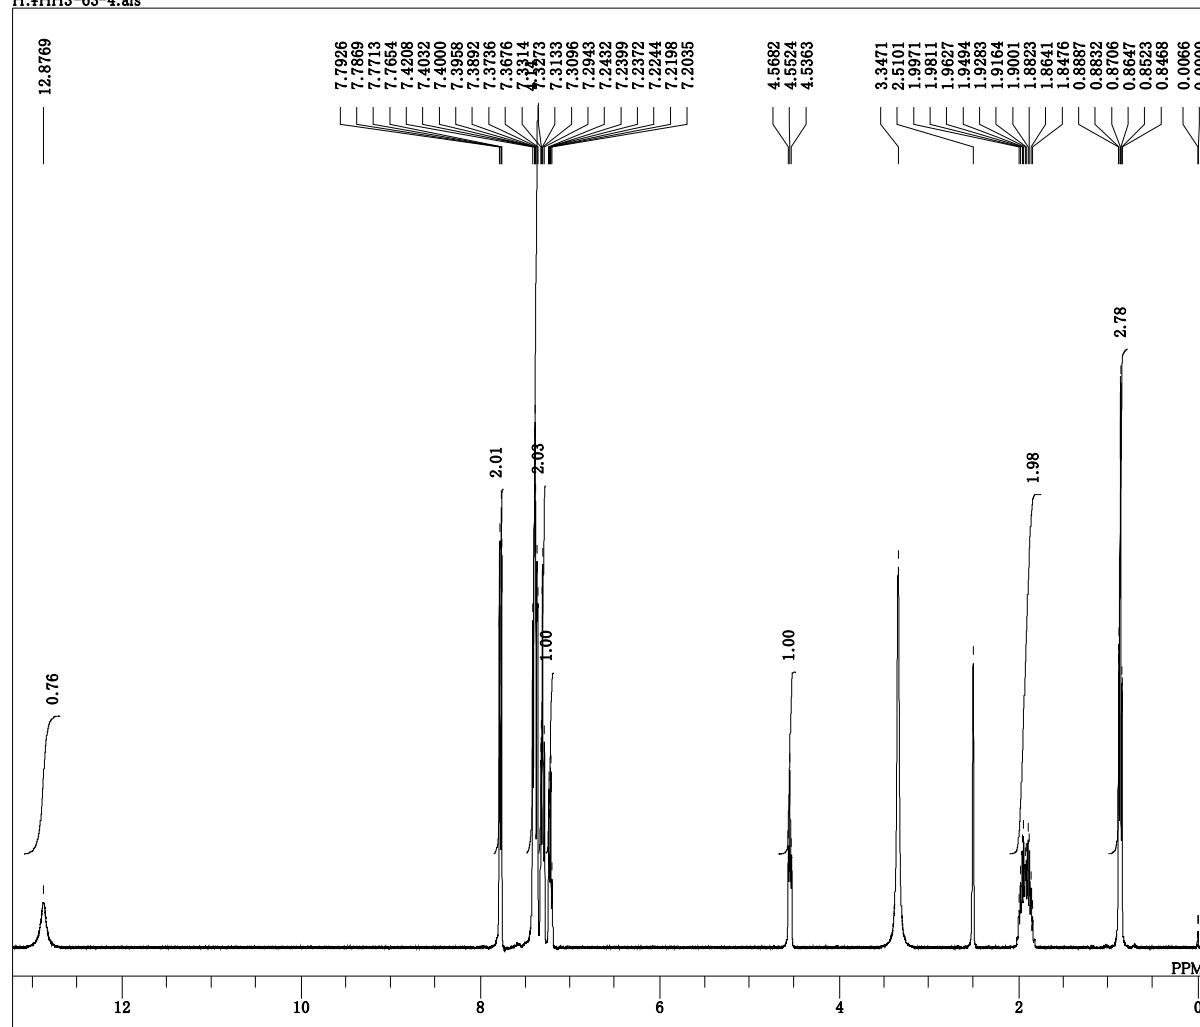

DFILE HH3-63-4.als  
COMNT HH3-63-4  
DATIM Fri Oct 28 17:23:07 2011  
OBNUC 1H  
EXMOD NON  
OBFRQ 399.65 MHz  
OBSET 124.00 KHz  
OBFIN 11300.00 Hz  
POINT 65536  
FREQU 6006.01 Hz  
SCANS 8  
ACQTM 10.9117 sec  
PD 1.0000 sec  
PW1 5.50 usec  
IRNUC 1H  
CTEMP 22.9 c  
SLVNT DMSO  
EXREF 0.00 ppm  
BF 0.12 Hz  
RGAIN 16

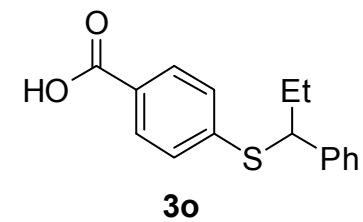

HH3-63-4C

H:HH3-63-4C.als

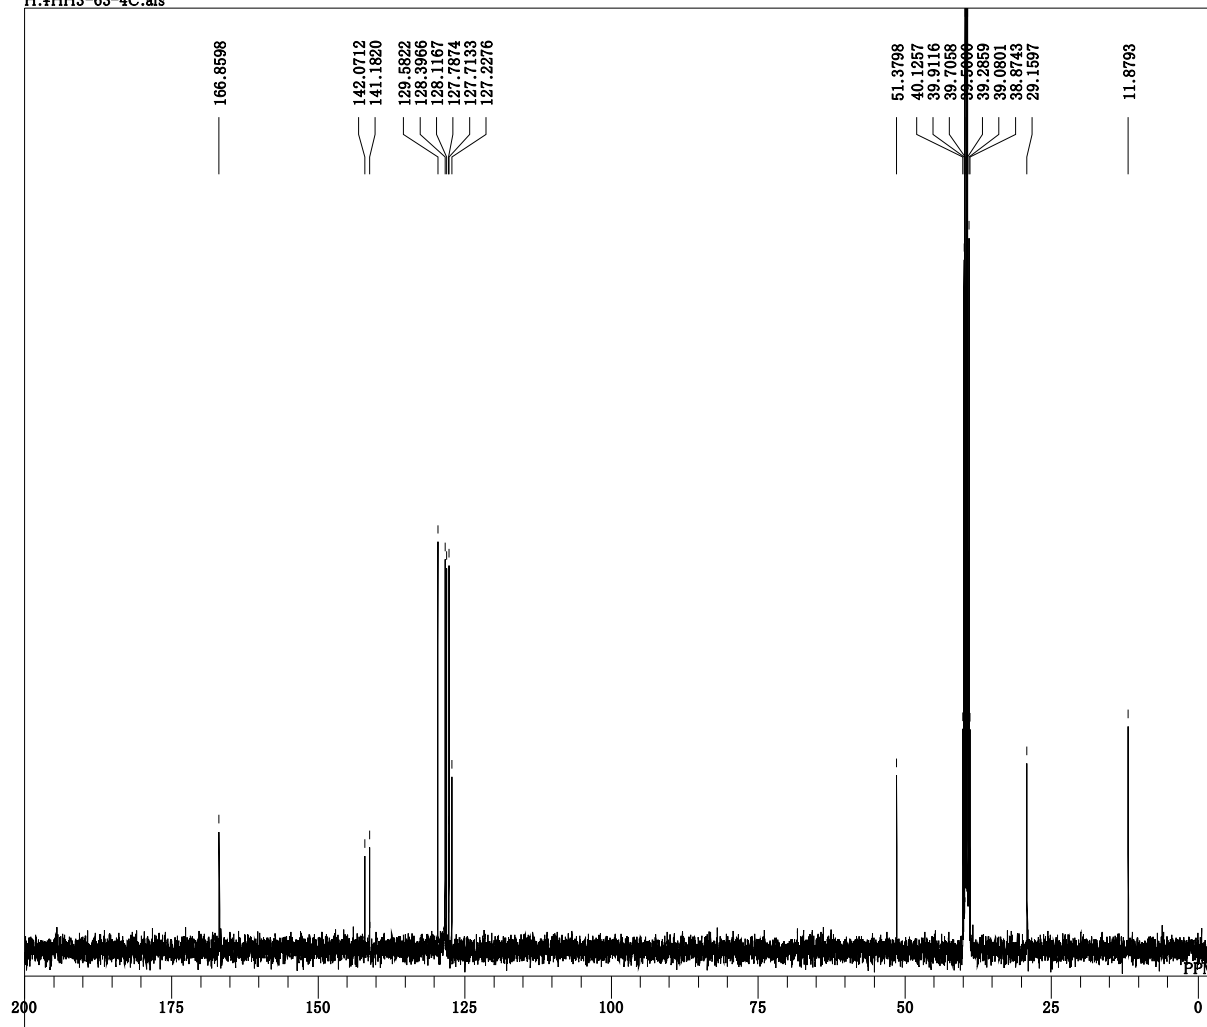

DFILE HH3-63-4C.als  
COMNT HH3-63-4C  
DATIM Fri Oct 28 17:30:59 2011  
OBNUC 13C  
EXMOD BCM  
OBFRQ 100.40 MHz  
OBSET 125.00 KHz  
OBFIN 10500.00 Hz  
POINT 32768  
FREQU 27118.64 Hz  
SCANS 140  
ACQTM 1.2083 sec  
PD 1.7920 sec  
PW1 4.70 usec  
IRNUC 1H  
CTEMP 22.7 c  
SLVNT DMSO  
EXREF 39.50 ppm  
BF 1.20 Hz  
RGAIN 24

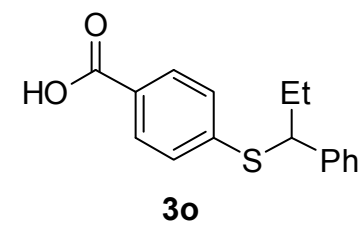

HH3-63-2

H:HH3-63-2.als

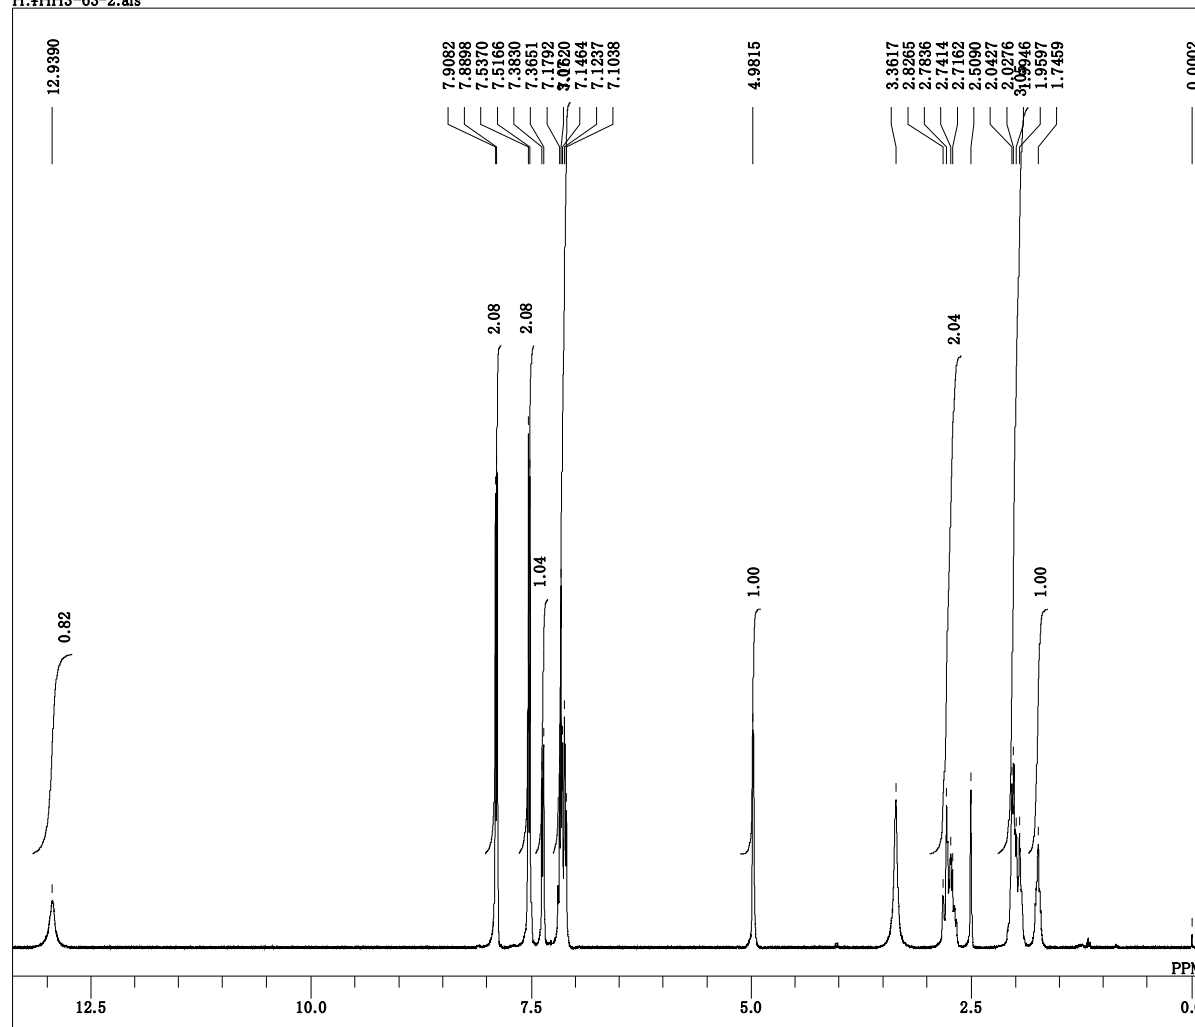

DFILE HH3-63-2.als  
COMNT HH3-63-2  
DATIM Fri Oct 28 16:57:45 2011  
OBNUC 1H  
EXMOD NON  
OBFRQ 399.65 MHz  
OBSET 124.00 KHz  
OBFIN 11300.00 Hz  
POINT 65536  
FREQU 6006.01 Hz  
SCANS 8  
ACQTM 10.9117 sec  
PD 1.0000 sec  
PW1 5.50 usec  
IRNUC 1H  
CTEMP 22.9 c  
SLVNT DMSO  
EXREF 0.00 ppm  
BF 0.12 Hz  
RGAIN 14

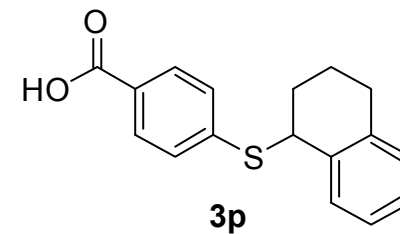

HH3-63-2C

H:HH3-63-2C.als

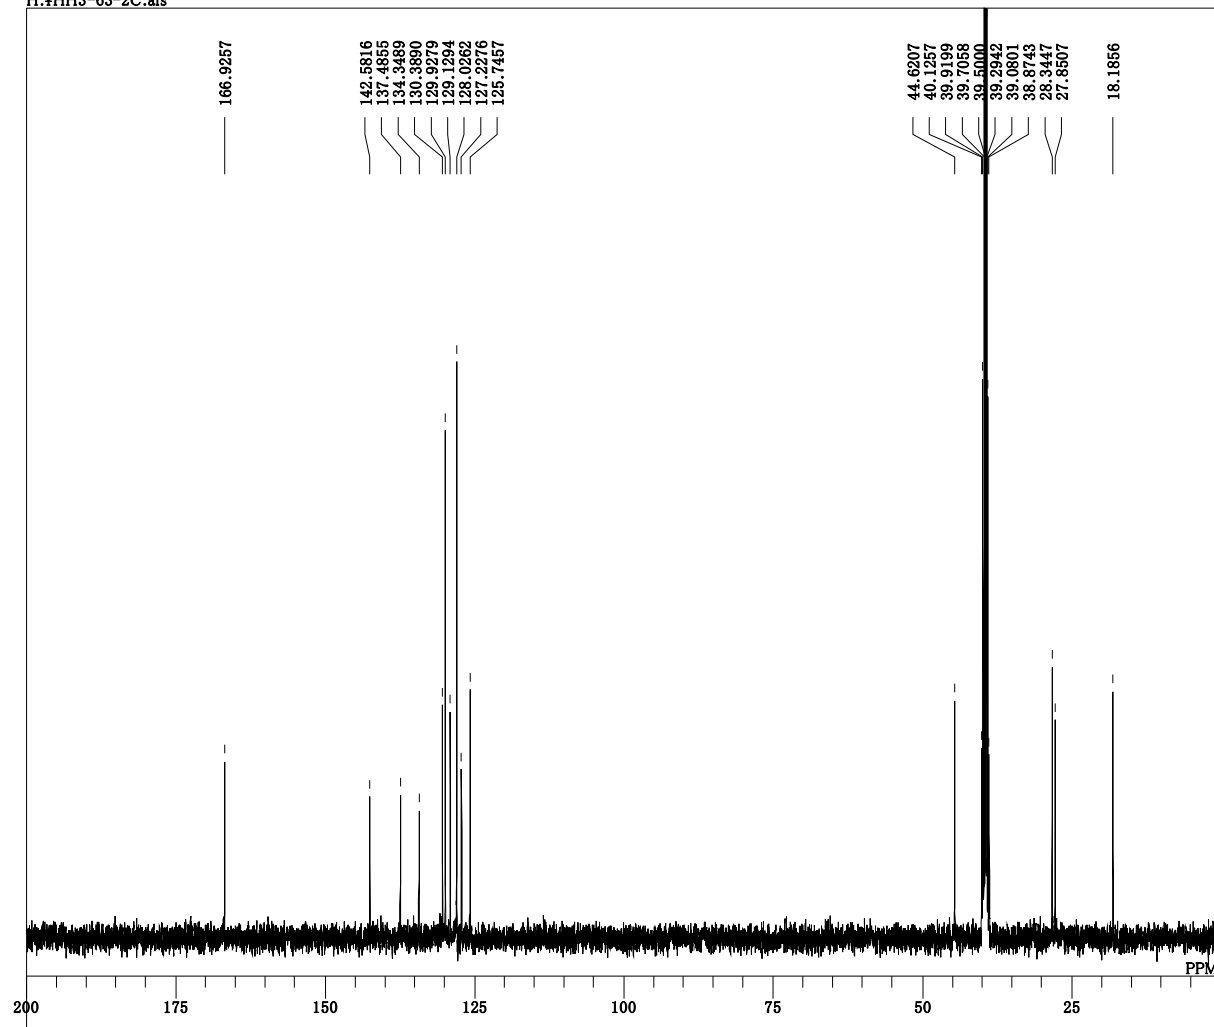

DFILE HH3-63-2C.als  
COMNT HH3-63-2C  
DATIM Fri Oct 28 17:04:13 2011  
OBNUC 13C  
EXMOD BCM  
OBFRQ 100.40 MHz  
OBSET 125.00 KHz  
OBFIN 10500.00 Hz  
POINT 32768  
FREQU 27118.64 Hz  
SCANS 111  
ACQTM 1.2083 sec  
PD 1.7920 sec  
PW1 4.70 usec  
IRNUC 1H  
CTEMP 23.1 c  
SLVNT DMSO  
EXREF 39.50 ppm  
BF 1.20 Hz  
RGAIN 24

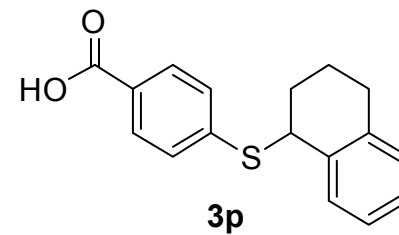

HH3-63-3

H:HH3-63-3.als

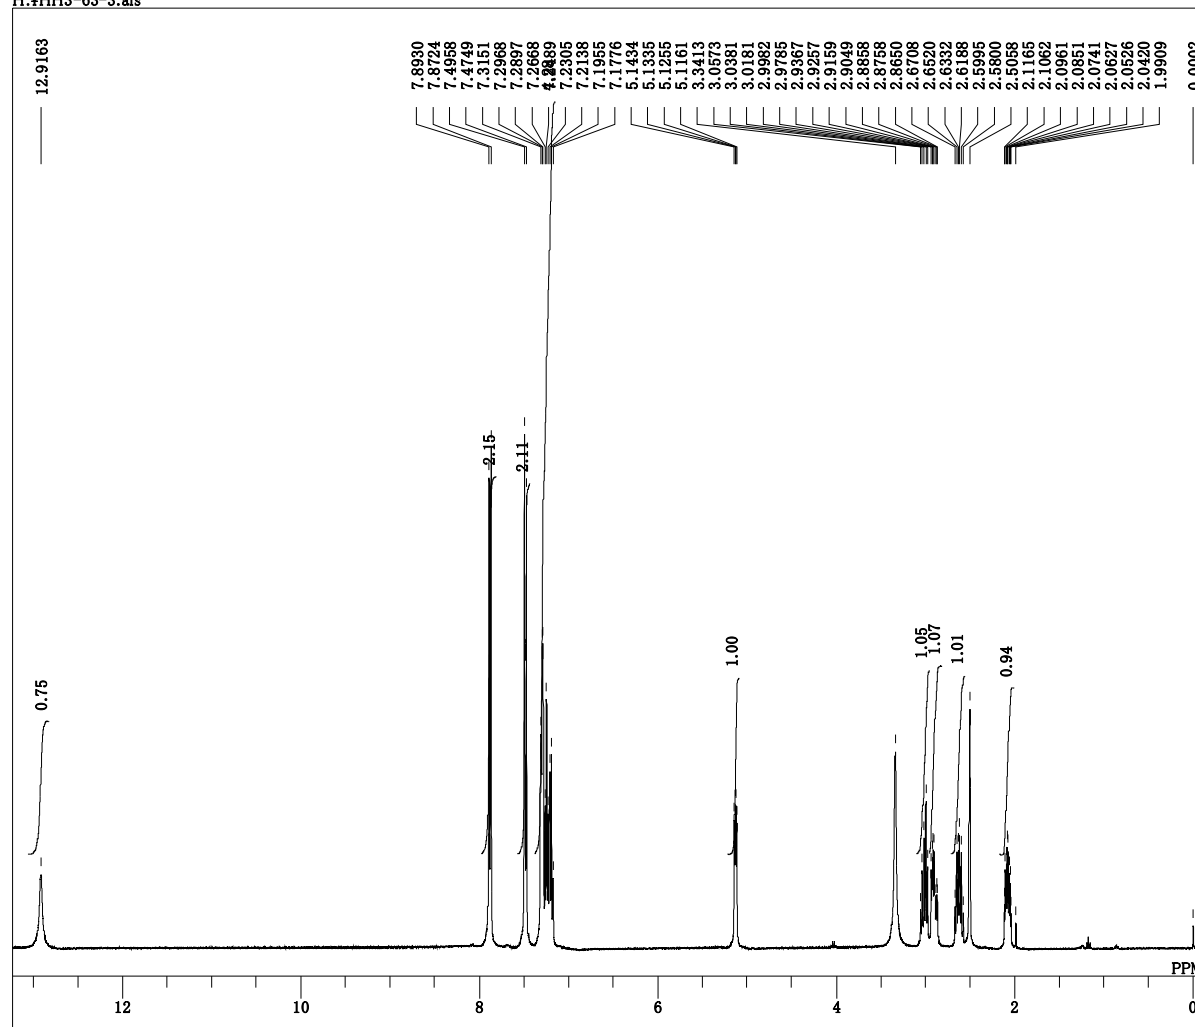

DFILE HH3-63-3.als  
COMNT HH3-63-3  
DATIM Fri Oct 28 17:09:17 2011  
OBNUC 1H  
EXMOD NON  
OBFRQ 399.65 MHz  
OBSET 124.00 KHz  
OBFIN 11300.00 Hz  
POINT 65536  
FREQU 6006.01 Hz  
SCANS 8  
ACQTM 10.9117 sec  
PD 1.0000 sec  
PW1 5.50 usec  
IRNUC 1H  
CTEMP 23.0 c  
SLVNT DMSO  
EXREF 0.00 ppm  
BF 0.12 Hz  
RGAIN 17

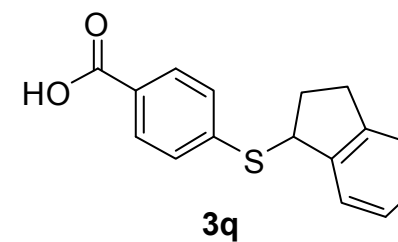

HH3-63-3C

H:HH3-63-3C.als

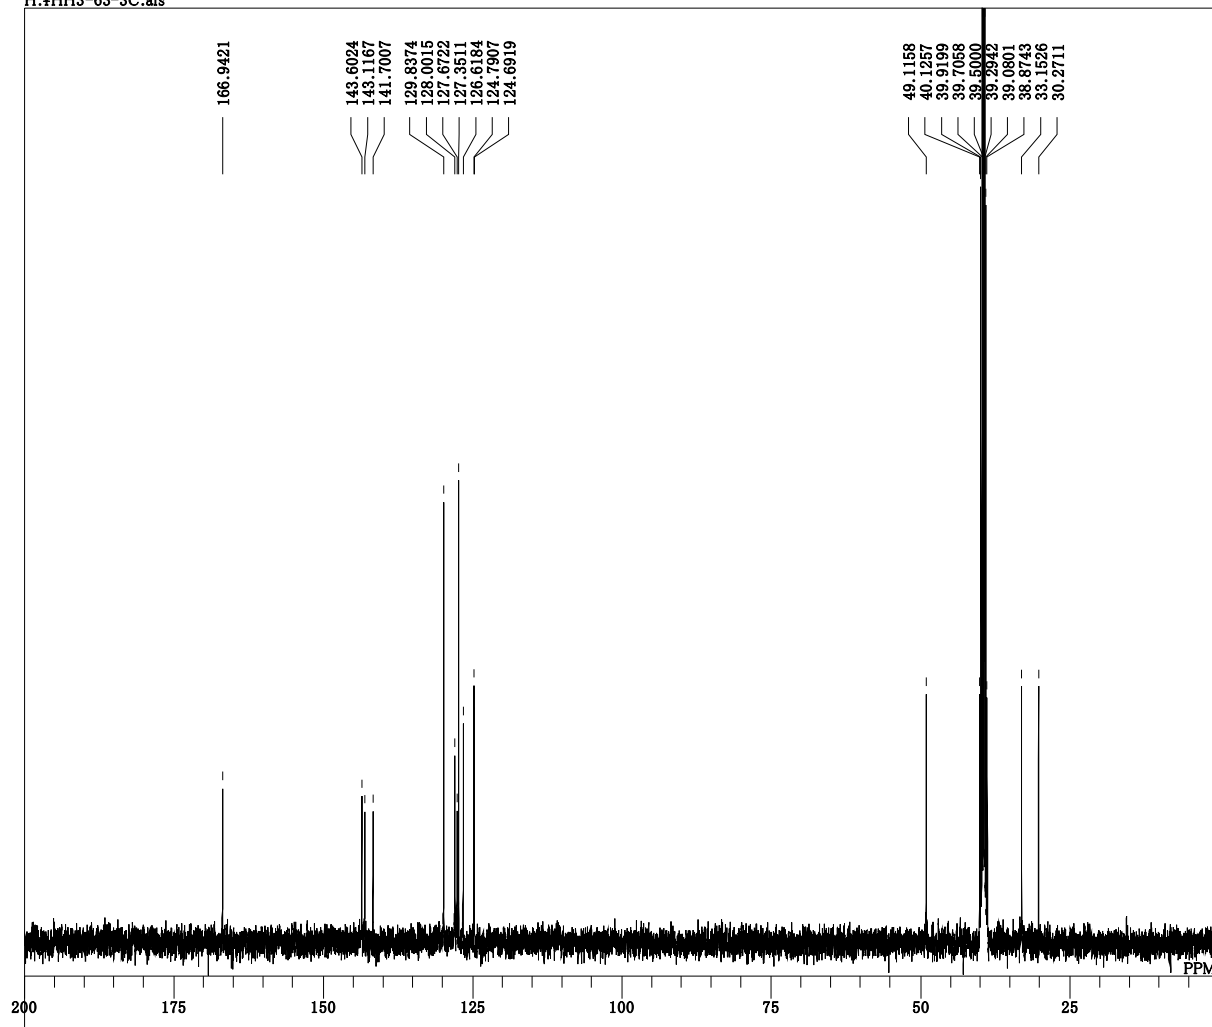

DFILE HH3-63-3C.als  
COMNT HH3-63-3C  
DATIM Fri Oct 28 17:17:59 2011  
OBNUC 13C  
EXMOD BCM  
OBFRQ 100.40 MHz  
OBSET 125.00 KHz  
OBFIN 10500.00 Hz  
POINT 32768  
FREQU 27118.64 Hz  
SCANS 157  
ACQTM 1.2083 sec  
PD 1.7920 sec  
PW1 4.70 usec  
IRNUC 1H  
CTEMP 23.0 c  
SLVNT DMSO  
EXREF 39.50 ppm  
BF 1.20 Hz  
RGAIN 24

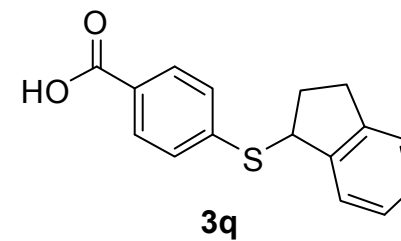

HH3-63-1

H:HH3-63-1.als

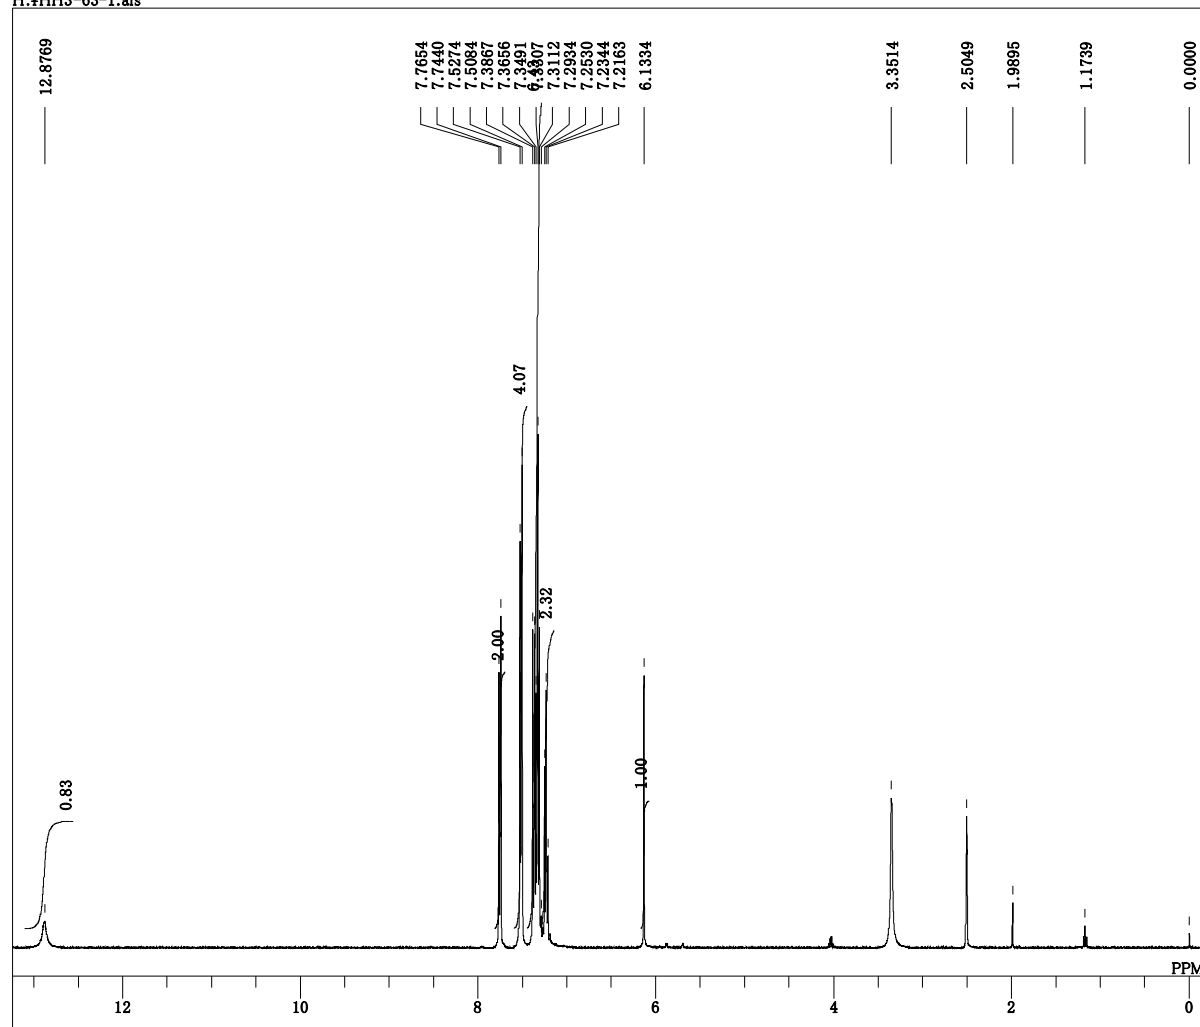

DFILE HH3-63-1.als  
COMNT HH3-63-1  
DATIM Fri Oct 28 16:51:12 2011  
OBNUC 1H  
EXMOD NON  
OBFRQ 399.65 MHz  
OBSET 124.00 KHz  
OBFIN 11300.00 Hz  
POINT 65536  
FREQU 6006.01 Hz  
SCANS 8  
ACQTM 10.9117 sec  
PD 1.0000 sec  
PW1 5.50 usec  
IRNUC 1H  
CTEMP 23.2 c  
SLVNT DMSO  
EXREF 0.00 ppm  
BF 0.12 Hz  
RGAIN 15

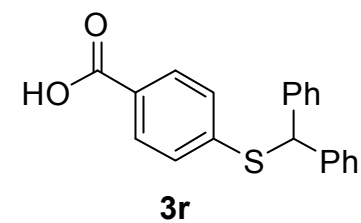

HH3-63-1C

H:HH3-63-1C.als

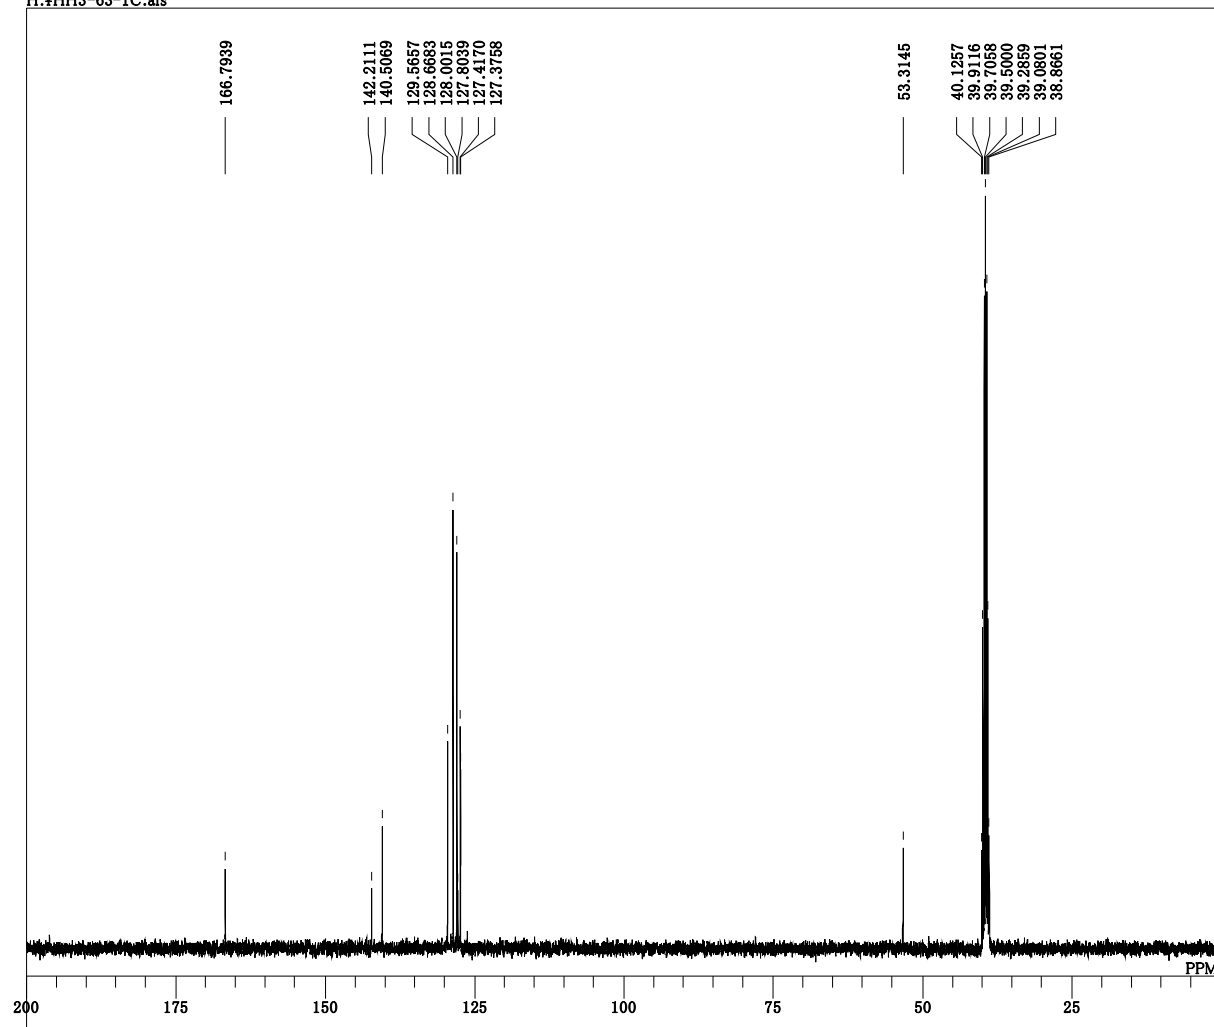

DFILE HH3-63-1C.als  
COMNT HH3-63-1C  
DATIM Fri Oct 28 16:47:59 2011  
OBNUC 13C  
EXMOD BCM  
OBFRQ 100.40 MHz  
OBSET 125.00 KHz  
OBFIN 10500.00 Hz  
POINT 32768  
FREQU 27118.64 Hz  
SCANS 119  
ACQTM 1.2083 sec  
PD 1.7920 sec  
PW1 4.70 usec  
IRNUC 1H  
CTEMP 23.6 c  
SLVNT DMSO  
EXREF 39.50 ppm  
BF 1.20 Hz  
RGAIN 25

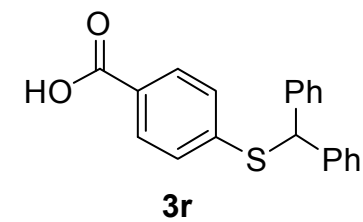

Supplement: c2ob25091h.pdf [file c2ob25091h.pdf]
